# Supplementary material for: Research Global sequence variation in the histidine-rich proteins 2 and 3 of Plasmodium falciparum: implications for the performance of malaria rapid diagnostic tests
Source: Springer Nature journal article supplement (doi:10.1186/1475-2875-9-129), 2021-07-11

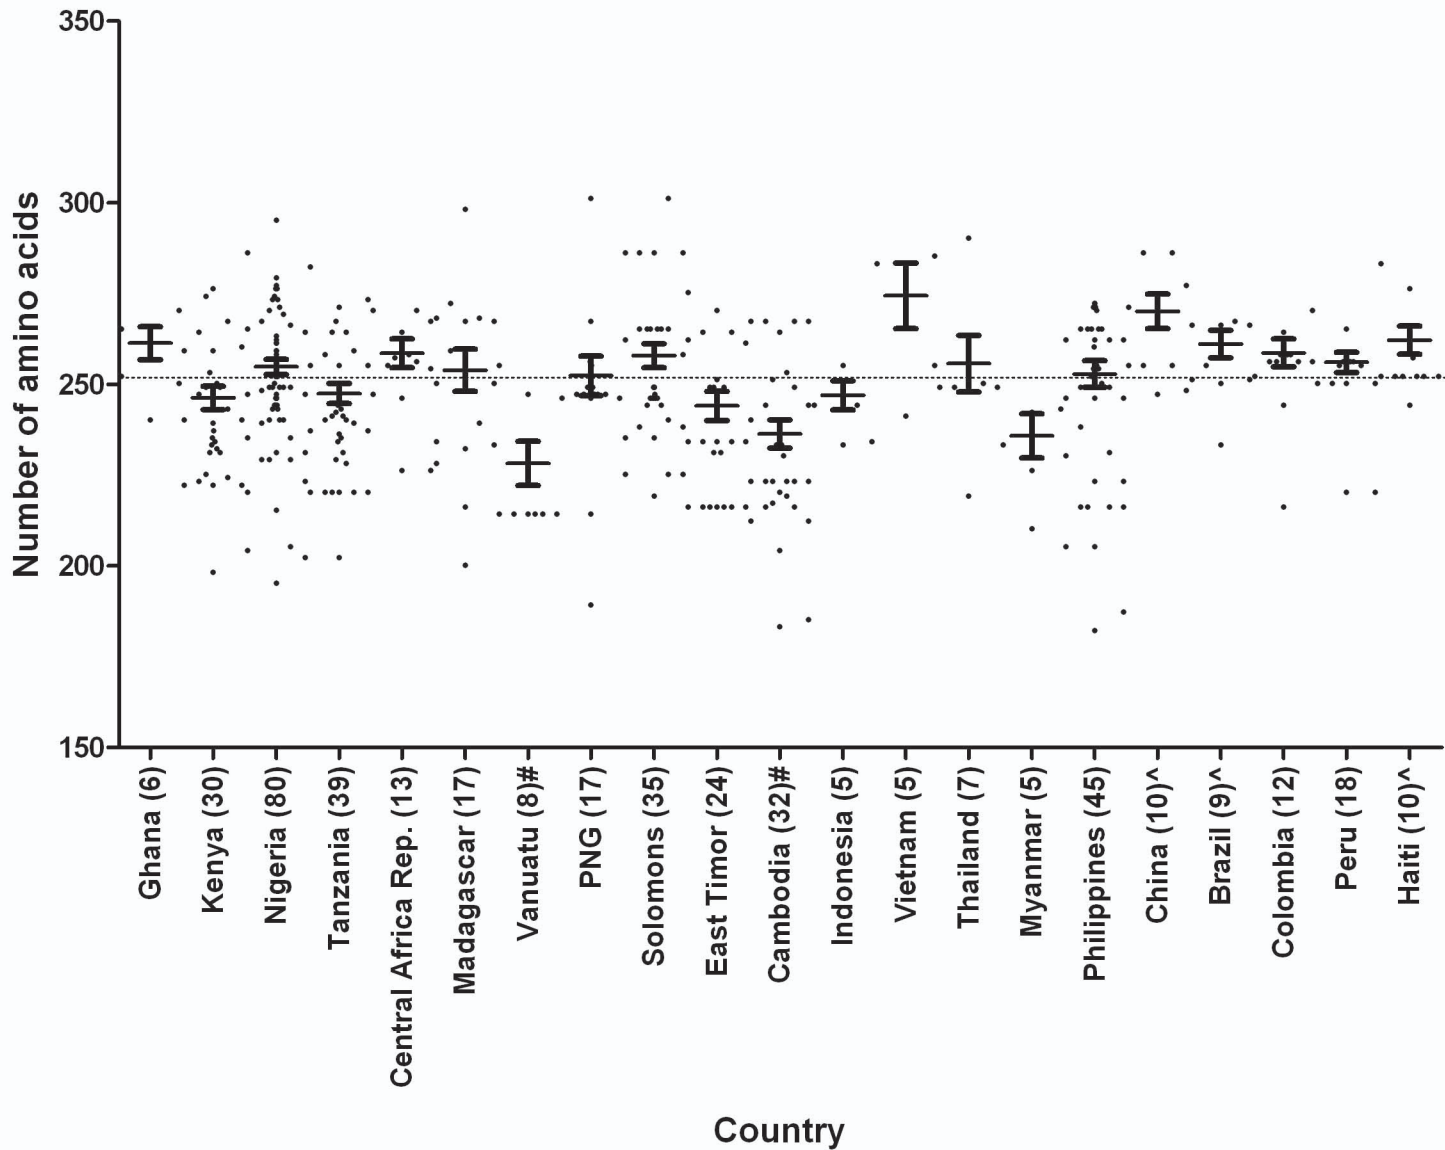

Supplement: 12936_2010_1210_MOESM5_ESM.pdf [file 12936_2010_1210_MOESM5_ESM.pdf]
